# Supplementary material for: Modeling stochasticity and variability in gene regulatory networks
Source: Springer Nature journal article supplement (doi:10.1186/1687-4153-2012-5), 2012-06-06

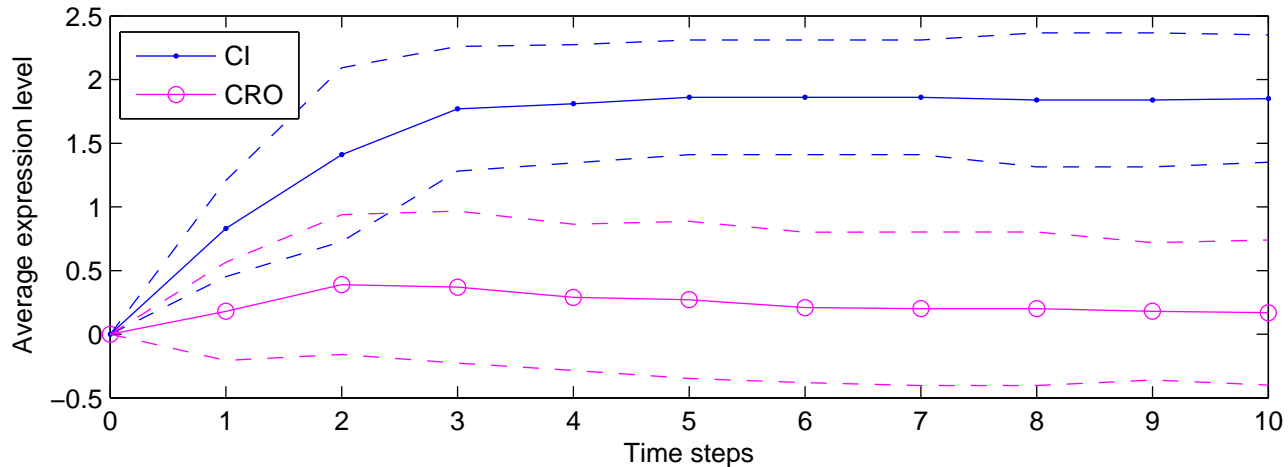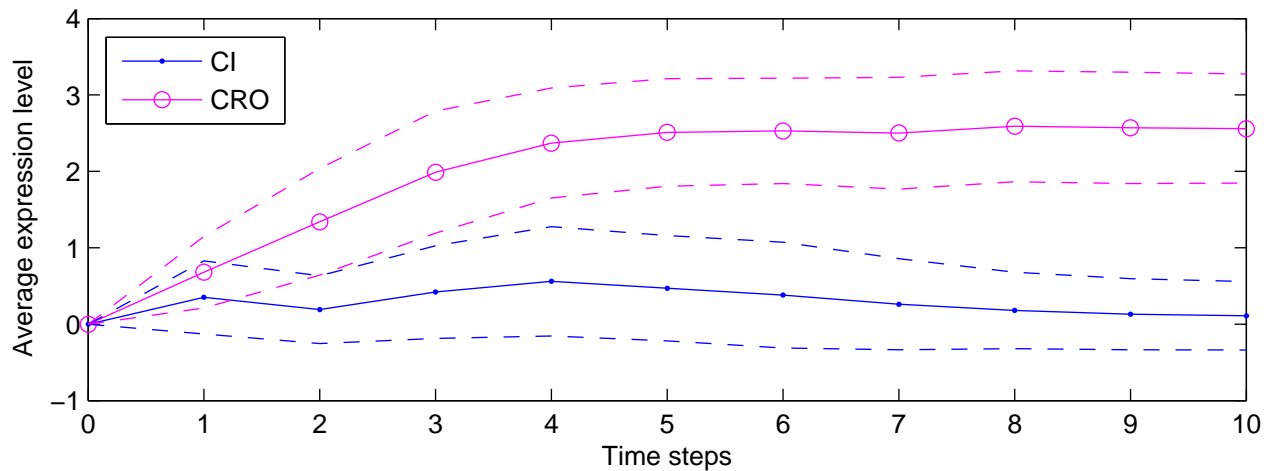

Supplement: 13637_2011_13_MOESM9_ESM.pdf [file 13637_2011_13_MOESM9_ESM.pdf]
